# Supplementary material for: The Validity of Ultra-Short-Term Heart Rate Variability during Cycling Exercise
Source: MDPI journal article supplement (doi:10.3390/s23063325), 2023-03-22
Supplement: s1 [file s1]

## Supplementary Materials

Table S1. The absolute values of HRV during exercise.

| Variable                   | Exercise intensity     | Time segments of HRV analysis |               |               |               |               |
|----------------------------|------------------------|-------------------------------|---------------|---------------|---------------|---------------|
|                            |                        | 180 sec                       | 120 sec       | 90 sec        | 60 sec        | 30 sec        |
| meanRR (ms)                | 20%VO <sub>2peak</sub> | 752.2 ± 116.4                 | 744.8 ± 113.0 | 738.8 ± 111.4 | 729.1 ± 111.5 | 718.2 ± 102.9 |
|                            | 50%VO <sub>2peak</sub> | 568.0 ± 65.4                  | 548.2 ± 63.0  | 539.1 ± 62.9  | 530.4 ± 60.6  | 522.8 ± 58.9  |
|                            | 80%VO <sub>2peak</sub> | 408.0 ± 45.5                  | 394.9 ± 42.6  | 388.7 ± 40.9  | 383.2 ± 39.3  | 378.4 ± 38.4  |
| HR (beat/min)              | 20%VO <sub>2peak</sub> | 81.7 ± 13.1                   | 82.4 ± 13.2   | 83.1 ± 13.4   | 84.3 ± 13.7   | 85.3 ± 13.0   |
|                            | 50%VO <sub>2peak</sub> | 107.0 ± 12.3                  | 110.9 ± 12.8  | 112.8 ± 13.2  | 114.6 ± 13.1  | 116.2 ± 13.1  |
|                            | 80%VO <sub>2peak</sub> | 148.7 ± 15.7                  | 153.6 ± 15.6  | 155.9 ± 15.4  | 158.1 ± 15.2  | 160.0 ± 15.2  |
| <i>Time-domain</i>         |                        |                               |               |               |               |               |
| SDNN (ms)                  | 20%VO <sub>2peak</sub> | 38.4 ± 17.3                   | 37.3 ± 17.3   | 36.2 ± 17.6   | 35.0 ± 17.5   | 33.0 ± 17.2   |
|                            | 50%VO <sub>2peak</sub> | 13.5 ± 6.2                    | 11.1 ± 5.2    | 10.5 ± 5.1    | 9.8 ± 4.6     | 9.3 ± 5.1     |
|                            | 80%VO <sub>2peak</sub> | 3.3 ± 1.2                     | 2.7 ± 1.0     | 2.5 ± 0.9     | 2.4 ± 0.9     | 2.4 ± 0.9     |
| RMSSD (ms)                 | 20%VO <sub>2peak</sub> | 38.1 ± 23.8                   | 37.3 ± 24.1   | 36.0 ± 24.6   | 34.4 ± 24.3   | 31.6 ± 21.9   |
|                            | 50%VO <sub>2peak</sub> | 10.7 ± 6.1                    | 8.5 ± 4.4     | 7.6 ± 4.1     | 7.3 ± 3.6     | 7.0 ± 4.0     |
|                            | 80%VO <sub>2peak</sub> | 3.2 ± 1.2                     | 2.9 ± 1.1     | 2.8 ± 1.1     | 2.8 ± 1.1     | 2.7 ± 1.2     |
| <i>Frequency-domain</i>    |                        |                               |               |               |               |               |
| LF (ms <sup>2</sup> )      | 20%VO <sub>2peak</sub> | 737.3 ± 560.5                 | 714.3 ± 551.3 | 676.0 ± 518.1 | 612.4 ± 411.4 | 572.2 ± 410.6 |
|                            | 50%VO <sub>2peak</sub> | 110.2 ± 86.4                  | 77.6 ± 71.9   | 78.6 ± 80.9   | 65.6 ± 71.7   | 53.4 ± 64.2   |
|                            | 80%VO <sub>2peak</sub> | 5.7 ± 6.2                     | 3.5 ± 5.1     | 3.4 ± 6.3     | 2.3 ± 2.9     | 2.3 ± 3.0     |
| HF (ms <sup>2</sup> )      | 20%VO <sub>2peak</sub> | 490.9 ± 445.6                 | 474.6 ± 442.8 | 460.2 ± 472.5 | 423.9 ± 427.0 | 342.3 ± 352.7 |
|                            | 50%VO <sub>2peak</sub> | 77.6 ± 93.1                   | 52.9 ± 65.7   | 45.8 ± 53.8   | 41.6 ± 51.9   | 44.2 ± 61.5   |
|                            | 80%VO <sub>2peak</sub> | 6.8 ± 9.7                     | 5.1 ± 10.6    | 5.4 ± 14.2    | 3.5 ± 5.1     | 4.7 ± 10.2    |
| LF/HF                      | 20%VO <sub>2peak</sub> | 2.4 ± 1.9                     | 2.6 ± 2.3     | 2.7 ± 2.8     | 2.6 ± 3.0     | 2.5 ± 2.3     |
|                            | 50%VO <sub>2peak</sub> | 2.2 ± 1.4                     | 2.3 ± 1.4     | 2.6 ± 2.0     | 2.5 ± 1.8     | 2.1 ± 1.6     |
|                            | 80%VO <sub>2peak</sub> | 1.4 ± 1.1                     | 1.2 ± 1.0     | 1.4 ± 1.5     | 1.6 ± 1.7     | 2.3 ± 4.5     |
| Heart rate/LF              | 20%VO <sub>2peak</sub> | 0.2 ± 0.2                     | 0.2 ± 0.2     | 0.2 ± 0.3     | 0.3 ± 0.3     | 0.6 ± 1.2     |
|                            | 50%VO <sub>2peak</sub> | 2.0 ± 2.7                     | 3.0 ± 2.9     | 5.1 ± 10.5    | 5.0 ± 8.3     | 12.1 ± 27.5   |
|                            | 80%VO <sub>2peak</sub> | 116.5 ± 251.6                 | 179.4 ± 247.1 | 196.2 ± 221.9 | 235.7 ± 271.8 | 372.3 ± 434.5 |
| <i>Non-linear analysis</i> |                        |                               |               |               |               |               |
| DFA $\alpha$ 1             | 20%VO <sub>2peak</sub> | 1.04 ± 0.25                   | 1.04 ± 0.25   | 1.03 ± 0.25   | 1.08 ± 0.30   | -             |
|                            | 50%VO <sub>2peak</sub> | 1.17 ± 0.17                   | 1.18 ± 0.20   | 1.21 ± 0.18   | 1.19 ± 0.23   | 1.21 ± 0.21   |
|                            | 80%VO <sub>2peak</sub> | 0.86 ± 0.28                   | 0.73 ± 0.26   | 0.72 ± 0.29   | 0.68 ± 0.31   | 0.66 ± 0.35   |
| DFA $\alpha$ 2             | 20%VO <sub>2peak</sub> | 0.32 ± 0.16                   | 0.32 ± 0.13   | 0.32 ± 0.14   | 0.38 ± 0.18   | -             |
|                            | 50%VO <sub>2peak</sub> | 0.55 ± 0.18                   | 0.58 ± 0.19   | 0.59 ± 0.20   | 0.54 ± 0.27   | 0.70 ± 0.28   |
|                            | 80%VO <sub>2peak</sub> | 0.92 ± 0.24                   | 0.92 ± 0.20   | 0.96 ± 0.23   | 1.02 ± 0.33   | 1.01 ± 0.44   |
| SampEn                     | 20%VO <sub>2peak</sub> | 1.74 ± 0.29                   | 1.74 ± 0.35   | 1.80 ± 0.41   | 1.87 ± 0.57   | -             |
|                            | 50%VO <sub>2peak</sub> | 1.51 ± 0.27                   | 1.55 ± 0.23   | 1.56 ± 0.21   | 1.58 ± 0.29   | 1.61 ± 0.28   |
|                            | 80%VO <sub>2peak</sub> | 1.80 ± 0.19                   | 1.84 ± 0.17   | 1.80 ± 0.18   | 1.82 ± 0.28   | 1.90 ± 0.57   |

Values are mean ± SD. Note that there were missing data (see Materials and Methods section). HR indicates heart rate; SDNN, standard deviation of all RR intervals; RMSSD, root mean square of successive RR interval differences, LF, low-frequency power; HF, high-frequency power; DFA, detrended fluctuation analysis; SampEn, sample entropy.

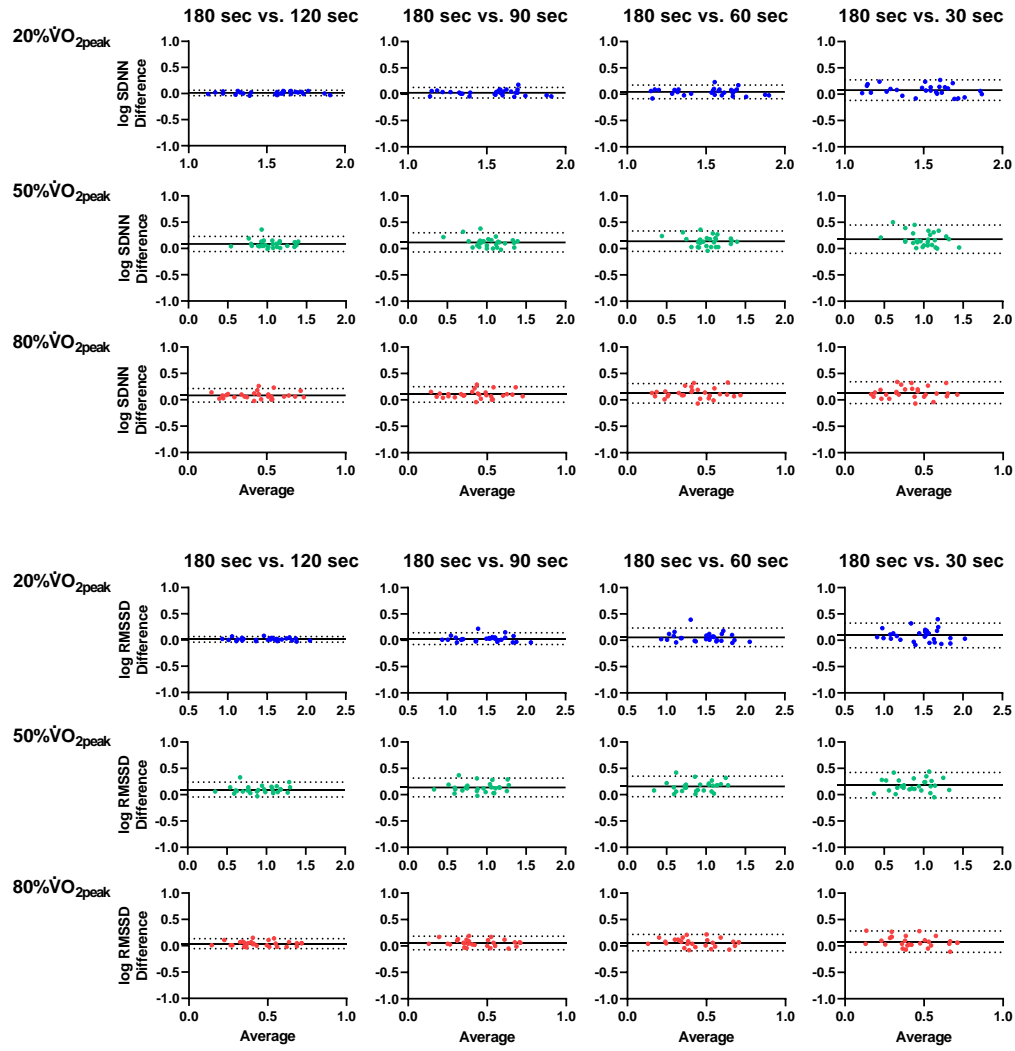

**Figure S1.** Bland-Altman plots between the 180 sec and other ultra-short-term (120 sec, 90 sec, 60 sec, and 30 sec) HRVs in time-domain. SDNN, standard deviation of all RR intervals; RMSSD, root mean square of successive RR interval differences; log, logarithmic; sec, seconds;  $\dot{V}O_{2peak}$ , peak oxygen uptake. The solid lines indicate the mean difference between the two values. Dash lines are the 95% limits of agreement.

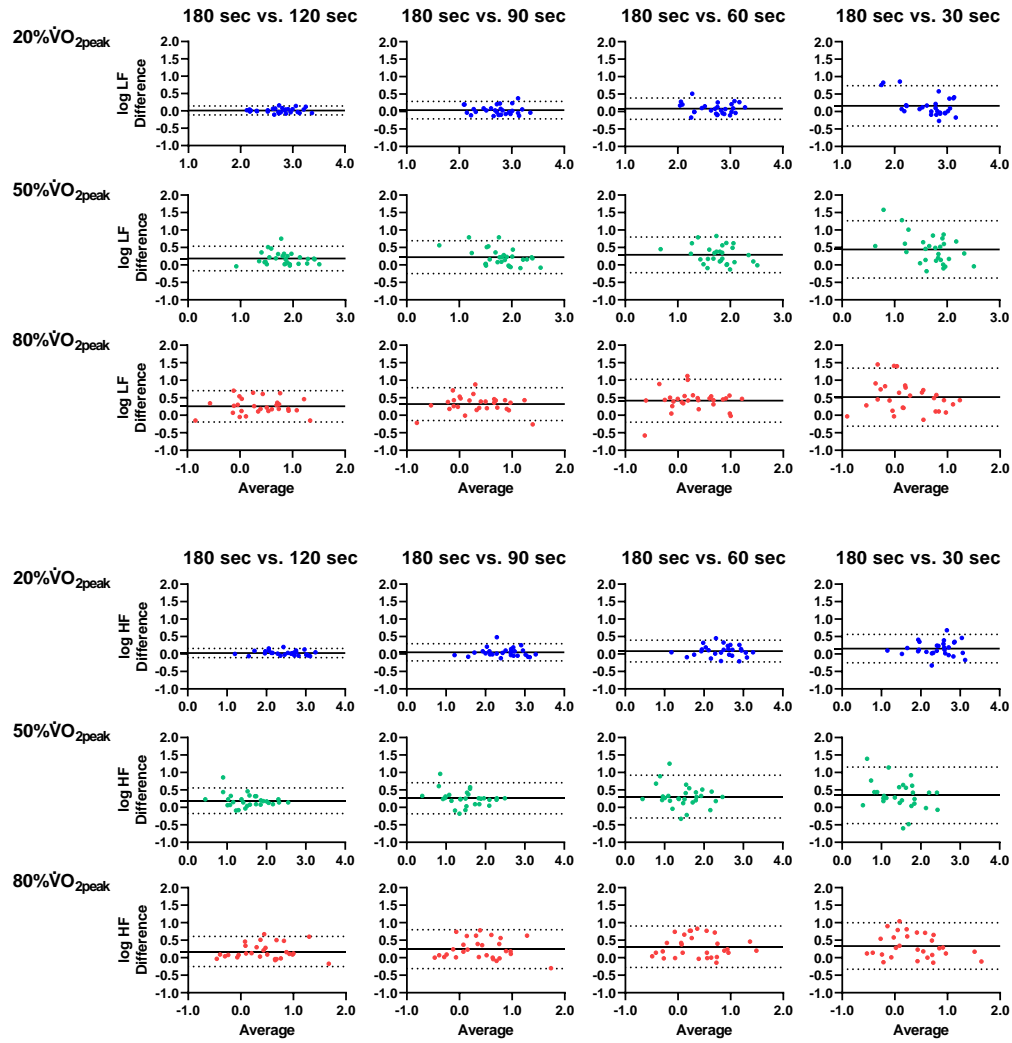

**Figure S2.** Bland-Altman plots between the 180 sec and other ultra-short-term (120 sec, 90 sec, 60 sec, and 30 sec) HRVs in frequency-domain. LF, low-frequency power; HF, high-frequency power; log, logarithmic; sec, seconds;  $\dot{V}O_{2peak}$ , peak oxygen uptake. The solid lines indicate the mean difference between the two values. Dash lines are the 95% limits of agreement.

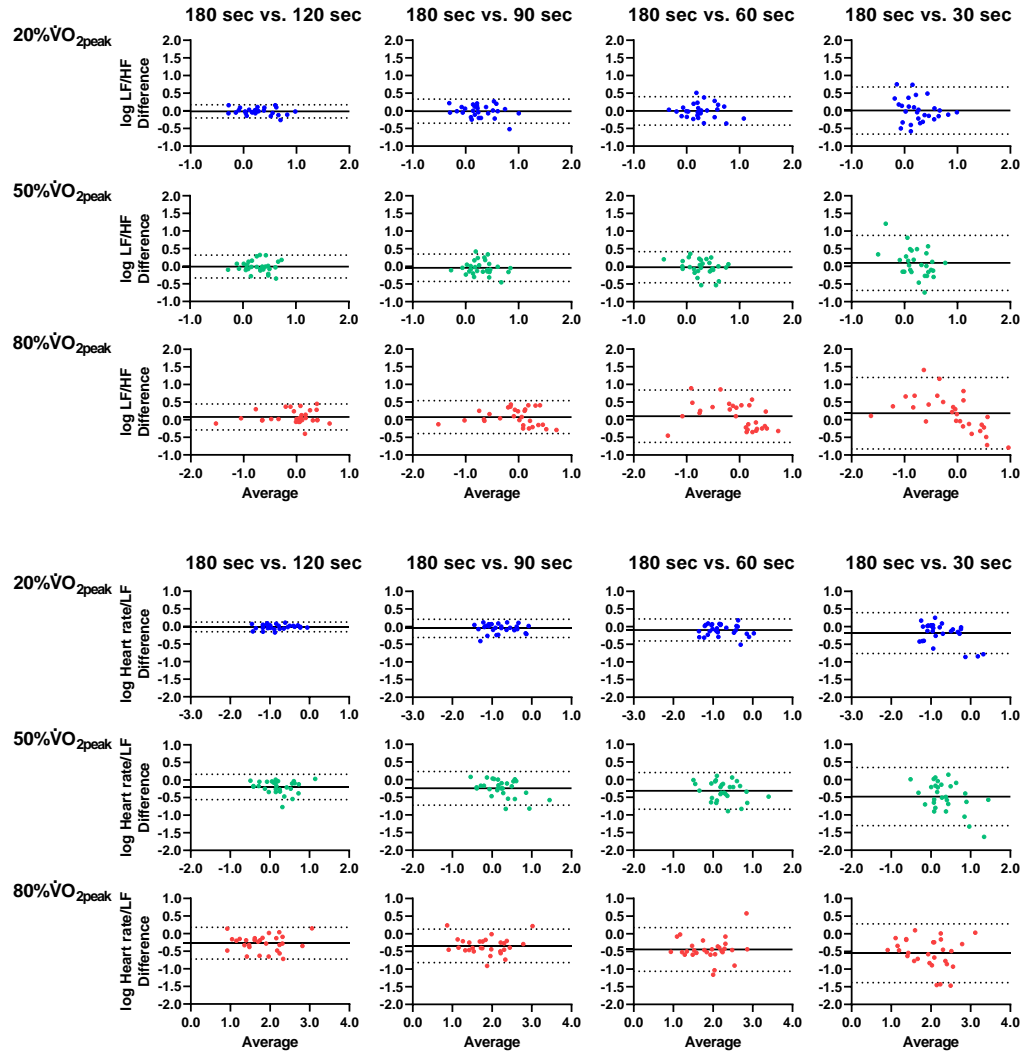

**Figure S3.** Bland-Altman plots between the 180 sec and other ultra-short-term (120 sec, 90 sec, 60 sec, and 30 sec) HRVs in the frequency-domain analysis. LF, low-frequency power; HF, high-frequency power; log, logarithmic; sec, seconds;  $\dot{V}O_{2peak}$ , peak oxygen uptake. The solid lines indicate the mean difference between the two values. Dash lines are the 95% limits of agreement.

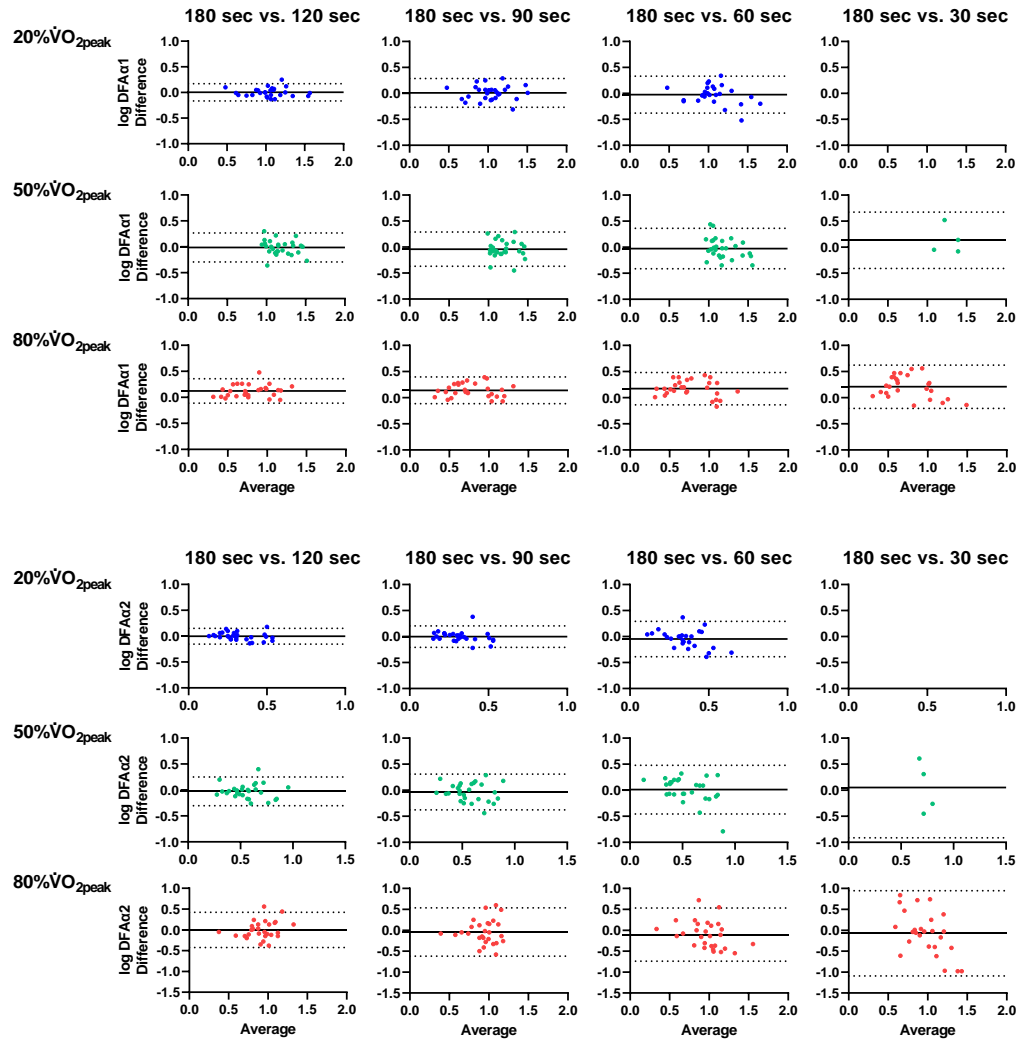

**Figure S4.** Bland-Altman plots between the 180 sec and other ultra-short-term (120 sec, 90 sec, 60 sec, and 30 sec) HRVs in DFA of non-linear analysis. DFA, detrended fluctuation analysis; log, logarithmic; sec, seconds;  $\dot{V}O_{2peak}$ , peak oxygen uptake. The solid lines indicate the mean difference between the two values. Dash lines are the 95% limits of agreement.

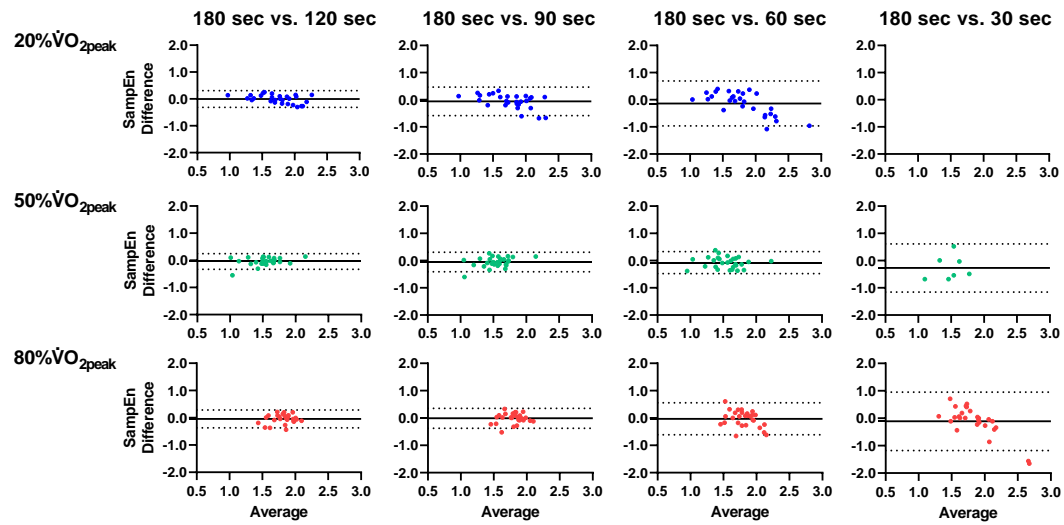

**Figure S5.** Bland-Altman plots between the 180 sec and other ultra-short-term (120 sec, 90 sec, 60 sec, and 30 sec) HRVs in SampEn of non-linear analysis. SampEn, sample entropy; log, logarithmic; sec, seconds;  $\dot{V}O_{2peak}$ , peak oxygen uptake. The solid lines indicate the mean difference between the two values. Dash lines are the 95% limits of agreement.
